# Supplementary material
Source: MDPI journal article supplement (https://www.mdpi.com/2227-7080/12/2/24)
Supplement: s1 [file s1 › technologies-2841755-supplementary.pdf]

## **Supporting Information**

### **High affinity of nanoparticles and matrices based on acid-base interaction for nanoparticle-filled membrane**

**Tsutomu Makino <sup>1</sup>, Keisuke Tabata <sup>1</sup>, Takaaki Saito <sup>1</sup>, Yosimasa Matsuo <sup>1</sup> and Akito Masuhara <sup>1,2,\*</sup>**

<sup>1</sup> Graduate School of Science and Engineering, Yamagata University, 4-3-16 Yonezawa, Yamagata 992-8510, JAPAN

<sup>2</sup> Frontier Center for Organic Materials (FROM), Yamagata University, 4-3-16 Yonezawa, Yamagata 992-8510, JAPAN

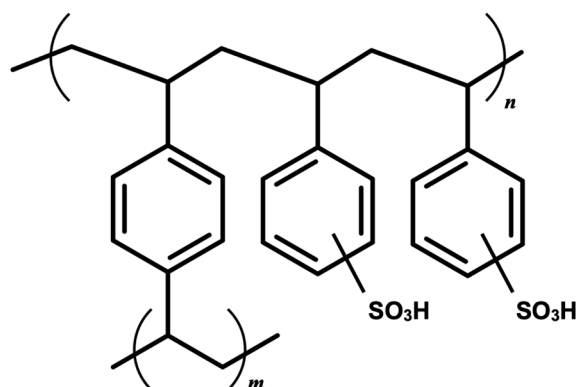

Figure S1. Chemical structure of DIAION™.

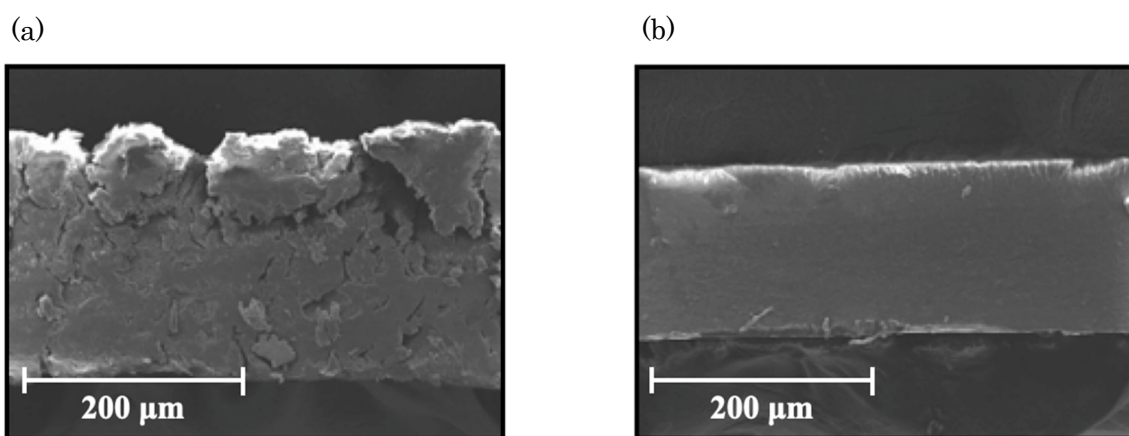

Figure S2. Cross-section SEM images (a) silica@PSSNa/P1VIm-co-PBA, and (b) silica@PSSA/P1VIm-co-PBA.

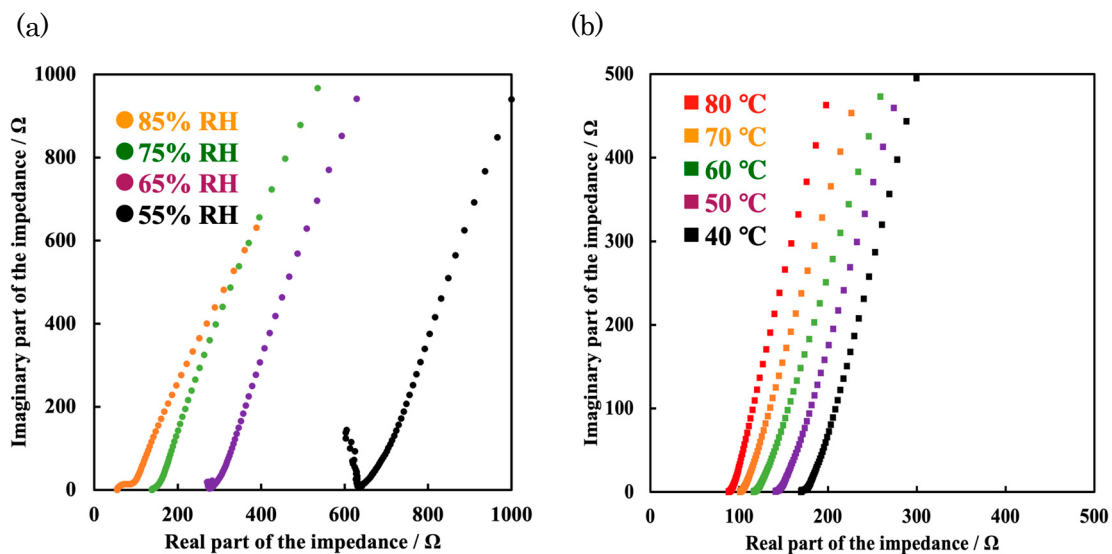

Figure S3. Cole-Cole plots of silica@PSSA pellet at the (a) different temperature and (b) different relative humidity.

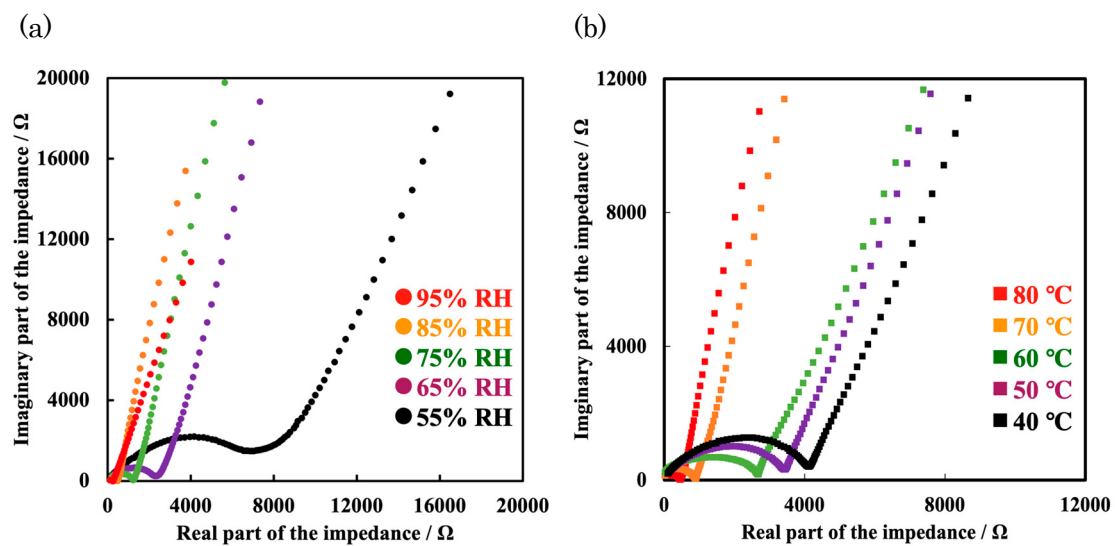

Figure S4. Cole-Cole plots of silica@PSSA/P1VIm-co-PBA membrane at the (a) different temperature and (b) different relative humidity.

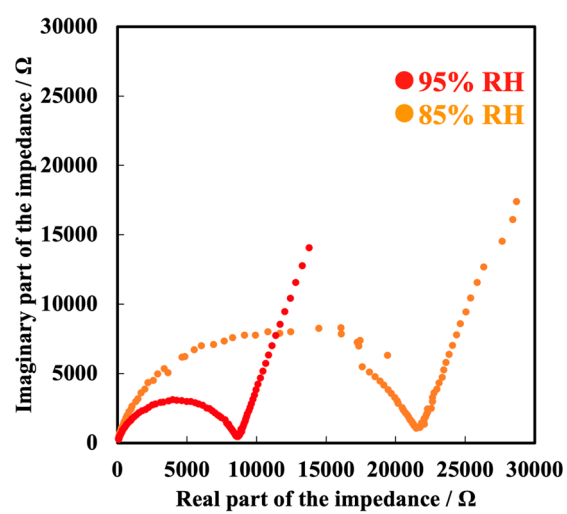

Figure S5. Cole-Cole plots of P1VIm-co-PBA membrane at the different relative humidity.

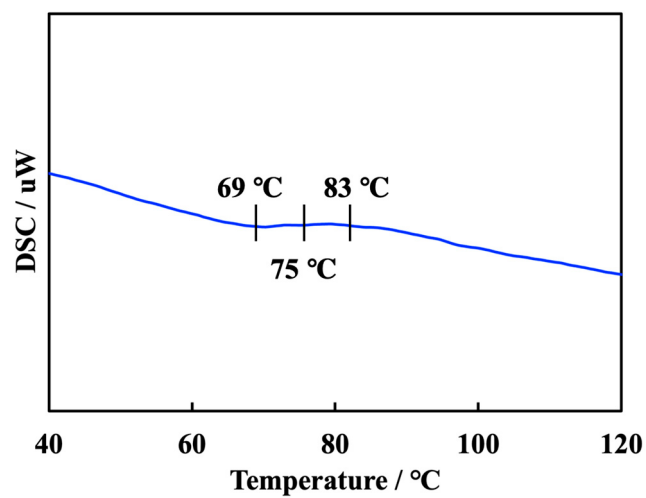

Figure S6. DSC curve of silica@PSSA/P1VIm-co-PBA.

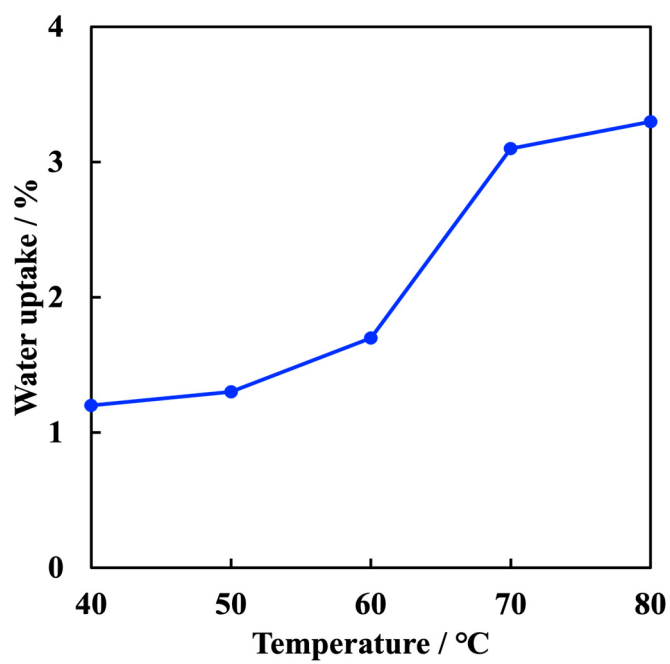

Figure S7. Water uptake of silica@PSSA/P1VIm-co-PBA.

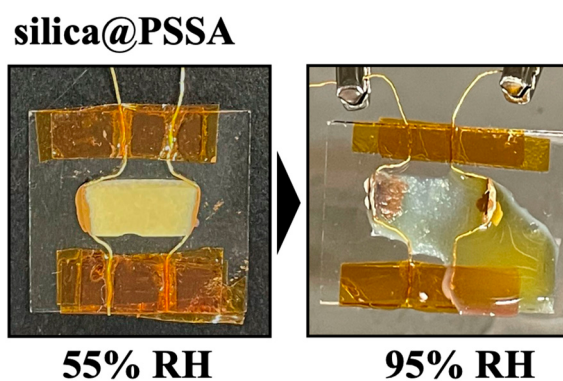

Figure S8. Photographs of silica@PSSA pellet at 55% RH and 95% RH.

| Particle concentration [wt%] | SEM image                                                                           | Proton conductivity [S/cm] |
|------------------------------|-------------------------------------------------------------------------------------|----------------------------|
| 30                           | 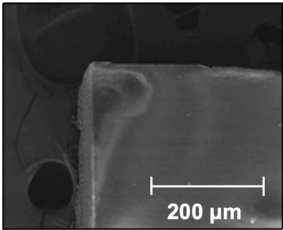  | $7.42 \times 10^{-5}$      |
| 40                           | 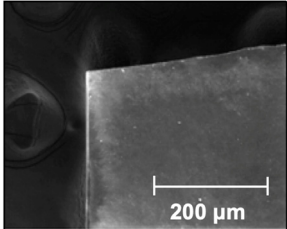 | $4.20 \times 10^{-4}$      |
| 50                           | 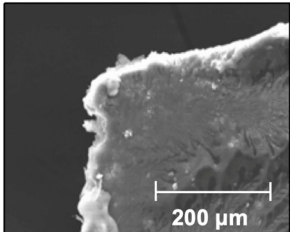 | $3.91 \times 10^{-4}$      |

Table S1. SEM images and proton conductivity of different particle concentrations of silica@PSSA/P1VIm-co-PBA.
